RESEARCH ARTICLE

# Effects of PPAR $\alpha$ inhibition in head and neck paraganglioma cells

Rosalba Florio<sup>1,2</sup>, Laura De Lellis<sup>1,2\*</sup>, Viviana di Giacomo<sup>1</sup>, Maria Carmela Di Marcantonio<sup>3</sup>, Loredana Cristiano<sup>4</sup>, Mariangela Basile<sup>1</sup>, Fabio Verginelli<sup>1,2</sup>, Delfina Verzilli<sup>1</sup>, Alessandra Ammazalorso<sup>1</sup>, Sampath Chandra Prasad<sup>5</sup>, Amelia Cataldi<sup>1</sup>, Mario Sanna<sup>5</sup>, Annamaria Cimini<sup>4,6,7</sup>, Renato Mariani-Costantini<sup>2,3</sup>, Gabriella Mincione<sup>3</sup>, Alessandro Cama<sup>1,2\*</sup>

**1** Department of Pharmacy, "G. d'Annunzio" University of Chieti-Pescara, Chieti, Italy, **2** Unit of General Pathology, CeSI-MeT, "G. d'Annunzio" University, Chieti, Italy, **3** Department of Medical, Oral and Biotechnological Sciences, "G. d'Annunzio" University of Chieti-Pescara, Chieti, Italy, **4** Department of Life, Health and Environmental Sciences, University of L'Aquila, L'Aquila, Italy, **5** Department of Otology and Skull Base Surgery, Gruppo Otologico, Piacenza, Italy, **6** Sbarro Institute for Cancer Research and Molecular Medicine, Temple University, Philadelphia, United States of America, **7** Gran Sasso National Laboratory (LNGS), National Institute for Nuclear Physics (INFN), Assergi, Italy

\* [laura.delellis@unich.it](mailto:laura.delellis@unich.it) (LDL); [alessandro.cama@unich.it](mailto:alessandro.cama@unich.it) (AC)

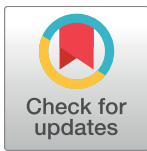

**OPEN ACCESS**

**Citation:** Florio R, De Lellis L, di Giacomo V, Di Marcantonio MC, Cristiano L, Basile M, et al. (2017) Effects of PPAR $\alpha$  inhibition in head and neck paraganglioma cells. PLoS ONE 12(6): e0178995. <https://doi.org/10.1371/journal.pone.0178995>

**Editor:** Aamir Ahmad, University of South Alabama Mitchell Cancer Institute, UNITED STATES

**Received:** October 19, 2016

**Accepted:** May 22, 2017

**Published:** June 8, 2017

**Copyright:** © 2017 Florio et al. This is an open access article distributed under the terms of the [Creative Commons Attribution License](https://creativecommons.org/licenses/by/4.0/), which permits unrestricted use, distribution, and reproduction in any medium, provided the original author and source are credited.

**Data Availability Statement:** All relevant data are within the paper and its Supporting Information files.

**Funding:** The study was supported by the Ministry of Education, University and Research (MIUR), Progetti di Ricerca di Interesse Nazionale (PRIN) funds (grant numbers 2010NFE9L\_008 and 2015B7M39T\_006, <http://prin.miur.it/>) assigned to A. Cama and by the Associazione Italiana per la Ricerca sul Cancro (AIRC) funds (grant number IG 16932, <http://www.airc.it/>) assigned to RMC. The

## Abstract

Head and neck paragangliomas (HNPGs) are rare tumors that may cause important morbidity, because of their tendency to infiltrate the skull base. At present, surgery is the only therapeutic option, but radical removal may be difficult or impossible. Thus, effective targets and molecules for HNPG treatment need to be identified. However, the lack of cellular models for this rare tumor hampers this task. PPAR $\alpha$  receptor activation was reported in several tumors and this receptor appears to be a promising therapeutic target in different malignancies. Considering that the role of PPAR $\alpha$  in HNPGs was never studied before, we analyzed the potential of modulating PPAR $\alpha$  in a unique model of HNPG cells. We observed an intense immunoreactivity for PPAR $\alpha$  in HNPG tumors, suggesting that this receptor has an important role in HNPG. A pronounced nuclear expression of PPAR $\alpha$  was also confirmed in HNPG-derived cells. The specific PPAR $\alpha$  agonist WY14643 had no effect on HNPG cell viability, whereas the specific PPAR $\alpha$  antagonist GW6471 reduced HNPG cell viability and growth by inducing cell cycle arrest and caspase-dependent apoptosis. GW6471 treatment was associated with a marked decrease of CDK4, cyclin D3 and cyclin B1 protein expression, along with an increased expression of p21 in HNPG cells. Moreover, GW6471 drastically impaired clonogenic activity of HNPG cells, with a less marked effect on cell migration. Notably, the effects of GW6471 on HNPG cells were associated with the inhibition of the PI3K/GSK3 $\beta$ / $\beta$ -catenin signaling pathway. In conclusion, the PPAR $\alpha$  antagonist GW6471 reduces HNPG cell viability, interfering with cell cycle and inducing apoptosis. The mechanisms affecting HNPG cell viability involve repression of the PI3K/GSK3 $\beta$ / $\beta$ -catenin pathway. Therefore, PPAR $\alpha$  could represent a novel therapeutic target for HNPG.

funders had no role in study design, data collection and analysis, decision to publish, or preparation of the manuscript.

**Competing interests:** The authors have declared that no competing interests exist.

## Introduction

Head and neck paragangliomas (HNPGLs) are rare neuroendocrine tumors, originating from paraganglia associated with autonomic branches of the lower cranial nerves [1]. They account for about 0.6% of all head and neck tumors and usually present between the 4<sup>th</sup> and 6<sup>th</sup> decades of life. HNPGLs mostly arise from paraganglia at the carotid bifurcation, in or around the jugular bulb, in the cervical tract of the vagus, or within the temporal bone. HNPGLs are generally slow-growing, but they infiltrate vascular structures and anatomically complex regions of the skull base. A high percentage of HNPGLs (over 30%) arises on the basis of genetic predisposition [1]. Germline mutations in the succinate-ubiquinone oxidoreductase (succinate dehydrogenase, SDH) subunits are the most frequently involved in HNPGL predisposition. The corresponding genes encode subunits (*SDHA*, *SDHB*, *SDHC*, *SDHD*) or cofactors (*SDHAF2*) of Complex II succinate dehydrogenase. This complex of the mitochondrial respiratory chain is responsible for the enzymatic oxidation of succinate to fumarate in the tricarboxylic acid cycle and for electron transport to coenzyme Q [2, 3]. At present, surgery is the only therapeutic option, but in some case radical removal may be difficult or impossible, depending on location and stage of progression [4]. When surgical eradication is not possible, radio- and chemotherapy are used, but only partial responses are observed even with targeted radiotherapy [5]. Thus, novel molecular targets and/or molecules that could be exploited in HNPGL therapy are highly needed. However, little is known about the effects of molecules with therapeutic potential in HNPGLs, also due to the lack of commercially available cell lines for this rare tumor. In a previous study we developed a primary human HNPGL cell culture and showed that lentiviral expression of tumor suppressor miRNAs downregulated in those cells was associated with apoptosis activation and cytotoxicity [6].

Peroxisome Proliferator-Activated Receptors (PPARs) are ligand-activated transcription factors involved in the regulation of glucose and lipid homeostasis, inflammation, proliferation, differentiation and cell death [7, 8]. Following ligand binding, PPARs heterodimerize with retinoid X receptor (RXR) triggering the transcription of a variety of target genes. The three PPAR subtypes, PPAR $\alpha$ , PPAR $\gamma$  and PPAR $\beta/\delta$ , are often activated in tumors, where these receptors appear to modulate cell proliferation, differentiation and survival, supporting an important role of PPARs in cancer biology [8]. Among PPARs, PPAR $\alpha$  receptors appear to have an important, but pleiotropic role in malignancy. Whether they function as tumor suppressors or promoters in cancers, it is context-dependent. Indeed, such functions appear to be related to cancer type and/or specific microenvironment of the tumor. In this regard, PPAR $\alpha$  receptor activation was reported in several tumors, including hepatocellular carcinoma [9], breast cancer [10], glioblastoma [11, 12], chronic lymphocytic leukemia (CLL) [13] and kidney cancer [14]. In particular, we have previously shown that PPAR $\alpha$  is strongly upregulated in high-grade glioma [15]. Moreover, PPAR $\alpha$ -deficient mice were refractory to liver carcinogenic effects of the PPAR $\alpha$  agonist WY14643 [16]. In addition, growth and progression of lung carcinoma and melanoma tumors engrafted in wildtype mice were completely suppressed when these tumors were implanted in PPAR $\alpha$ -deficient mice [17]. These reports indicated PPAR $\alpha$  as a promising target for the treatment of cancer. To this end, a few PPAR $\alpha$  antagonists are available and some have been shown to exert beneficial effects in cancer [18–20]. However, to date, no selective PPAR $\alpha$  antagonists have been tested in human trials.

The role of PPAR $\alpha$  in HNPGLs is not known. In the present study we evaluated the expression of PPAR $\alpha$  and the effects of stimulating or inhibiting this receptor with a specific agonist (WY14643) or antagonist (GW6471), respectively, in a unique model of HNPGL cells. Our results show that PPAR $\alpha$  is highly expressed in HNPGL cells and that the antagonist GW6471

reduces viability of HNPGL cells through mechanisms involving cell cycle arrest and apoptosis.

## Materials and methods

### Reagents and antibodies

The PPAR $\alpha$  antagonist GW6471 was obtained from Tocris Bioscience (Bristol, UK). 3-(4,5-Dimethyl-2-thiazolyl)-2,5-diphenyl-2H-tetrazolium bromide (MTT), l-glutamine, 4',6-diamino-2-phenylindole dilactate (DAPI), crystal violet, the PPAR $\alpha$  agonist WY14643, the RNase and the propidium iodide (PI) solution were obtained from Sigma (St. Louis, MO, USA). Mouse monoclonal anti-cyclin D3 antibody, rabbit monoclonal anti-CDK4 antibody, rabbit monoclonal anti-p21Waf1/Cip1 antibody, anti-rabbit IgG/HRP-linked and anti-mouse IgG/HRP-linked were purchased from Cell Signaling Technology, Inc. (Beverly, MA, USA). Rabbit monoclonal antibodies anti-PI3K and anti-GSK3 $\beta$  were obtained from Abcam (Cambridge, UK). Rabbit polyclonal anti-pser9GSK3 $\beta$  was obtained from Enogene Biotech. (Aachen, Germany). Mouse monoclonal antibody anti-cyclin B1, rabbit polyclonal anti- $\beta$ -Catenin and mouse monoclonal anti-glyceraldehyde-3-phosphate dehydrogenase (GAPDH) were obtained from Santa Cruz Biotechnology, Inc. (Dallas, TX, USA). Monoclonal anti- $\beta$ -actin antibody was obtained from Sigma (St. Louis, MO, USA). Rabbit anti-PPAR $\alpha$  and rabbit anti-PPAR $\gamma$  were obtained from Thermo Scientific (Rockford, IL, USA). Rabbit anti-PPAR $\beta/\delta$  was obtained from Affinity Bioreagents Inc. (Golden, CO, USA). Anti-rabbit IgG Alexa Fluor 488 conjugated secondary antibodies were purchased from Molecular Probes (Life Technology, Carlsbad, CA, USA).

### Cells and treatments

Primary HNPGL cell cultures were established as previously described [6] from two prospectively sampled tympano-jugular HNPGL patients (PTJ64 and PTJ86) carrying the *SDHC* c.43C>T (p. Arg15\*) and *SDHD* c. 27delC (p. Val10Phefs\*5) mutations, respectively. For mutational analysis the coding regions and exon-intron boundaries of *SDHB*, *SDHC* and *SDHD* genes were amplified by PCR as previously described [6, 21, 22]. PCR products were subjected to 2% agarose gel electrophoresis with ethidium bromide staining and subsequently sequenced using a genetic analyzer (ABI PRISM 310; Applied Biosystems, Milan, Italy). Biospecimens from which primary cultures derived were collected after written informed consent from patients operated at the Gruppo Otologico, Piacenza, Italy. Study protocols and consent forms were approved by the Bioethical Committee of G. d'Annunzio University (protocol #841/10COET). The cultures were immortalized by retroviral-mediated transduction of full-length hTERT and simian virus 40 (SV40) large-tumor (LT) antigen (Addgene, <https://www.addgene.org/>). The hTERT virus was constructed by co-transfecting vectors bringing cDNAs for Gag-polymerase, virus envelope proteins and full-length hTERT (pBabe-hygro-hTERT) into HEK293 cells. An analogue procedure was followed to construct the SV40LT virus using the pBabe-puro SV40LT vector. Mid-confluence HNPGL primary cultures at passage 4 were exposed for 3–6 hours to filtered (0.4  $\mu$ m) supernatants from the retroviral packaging cell line containing the virus construct for SV40LT, in the presence of polybrene (5  $\mu$ g/ml). Infected HNPGL cells were incubated with puromycin to select SV40LT transduced cells. These cells were grown for two passages before the second infection with supernatants from the retroviral packaging cell line containing the virus construct hTERT and cells transduced with hTERT were selected by hygromycin B. Immortalized HNPGL cells (PTJ64i and PTJ86i, respectively) cultured in DMEM-F12 (Gibco), supplemented with 10% FBS, at 37°C, 5% CO<sub>2</sub>, were employed in subsequent experiments.

Stock solutions of GW6471 (70 mM) and WY14643 (35 mM) were prepared in DMSO. The final concentration of DMSO in experiments was 0.16% and showed no HNPGL cell toxicity.

## Immunohistochemistry

Two different HNPGL cases were analyzed for immunohistochemistry (IHC). Sections were deparaffinized by using xylene and graded ethanol and rehydrated. Slides were then immersed in 10mM sodium citrate buffer, pH 6.1, and processed for the antigen-retrieval procedure, using a microwave oven operated at 720W, for 10 min. After cooling, slides were transferred to phosphate buffer saline (PBS) containing 5% bovine serum albumin (BSA, blocking solution), for 1h at room temperature and then incubated, overnight at 4°C, with rabbit polyclonal anti-PPAR $\alpha$  antibody (1:200, Thermo Scientific Inc., USA) diluted in blocking solution. In control sections, the primary antibody was omitted. Slides were then incubated for 1h at RT with biotinylated goat anti-rabbit IgG (1:200, Vector Laboratories, Burlingame, CA, USA), diluted in blocking solution. Immuno-complexes were revealed by means of an avidin biotin system (Vectastain Elite ABC kit, Vector Laboratories), using 3,3'-diamino-benzidine (DAB Substrate kit for Peroxidase, Vector Laboratories), as the chromogen. Slides were finally dehydrated and mounted with Eukitt (Kindler GmbH & Co., Freiburg, Germany).

## Immunofluorescence

Cells plated on poly-L-lysine coated coverslip were washed twice with PBS, fixed for 10 minutes at room temperature in 4% paraformaldehyde in PBS and permeabilized in PBS containing 0.1% Triton X-100 for 10 min at room temperature. Nonspecific binding sites were blocked for 30 min with 3% BSA in PBS (incubation buffer). According to the experiment, cells were then incubated with anti-PPAR $\alpha$  (1:200), or anti-PPAR $\beta/\delta$  (1:200) or anti-PPAR $\gamma$  (1:200) in incubation buffer overnight at 4°C. After extensive washings with PBS the cells were incubated with AlexaFluor 488 secondary antibodies 30 min at room temperature. Cells were then washed and mounted with Vectashield mounting medium from Vector Laboratories containing DAPI. Cells were photographed at fluorescence microscope AXIOPHOT (Zeiss microscope, Jena, Germany).

## Cell viability and counting

Cell viability was tested by MTT assay as previously described [23]. The dose and the schedule of GW6471 or WY14643 treatments were selected based on dose-response curves constructed in preliminary experiments. Briefly, cells were seeded in 96-well plates ( $4 \times 10^3$  cells/well) and incubated with the indicated treatments (5 replica wells per each condition) for 72 hours. Then, cells were incubated with the MTT solution for at least 3 hours, until a purple precipitate was visible. Then, the MTT solution was removed and crystalline precipitate in each well was dissolved in DMSO. Absorbance of each well at 570 nm was quantified using a microplate reader (SoftMaxPro, Molecular Devices, CA, USA). For cell counting, HNPGL cell cultures were treated with GW6471 (24  $\mu$ M) or vehicle (DMSO) in triplicate. After seeding ( $9.5 \times 10^5$  cells/75 cm<sup>2</sup> flask), cells were incubated with GW6471 or vehicle and viable cells were counted at 24, 48 and 72 hours using the trypan blue exclusion test [24].

## Cell cycle analysis

Approximately  $0.5 \times 10^6$  cells per experimental condition were harvested, fixed in 70% cold ethanol and kept at 4°C overnight. Cells were then resuspended in 20  $\mu$ g/ml PI and 100  $\mu$ g/ml

RNAse, final concentrations. Cell cycle profiles ( $10^5$  cells) were analyzed by a FC500 flow cytometer with the FL3 detector in a linear mode using the CXP software (Beckmann Coulter, FL, USA). Data were analyzed with ModFit software (Verity Software House, ME, USA).

### Apoptosis assay

To assess apoptosis a commercial Annexin-V-FITC/PI Kit (Bender Med System, Vienna, Austria) was used according to the manufacturer's instructions. Briefly, the cells were gently resuspended in binding buffer and incubated for 10 min at room temperature in the dark with Annexin-V-FITC. Samples were then washed and analyses were performed with an FC500 Coulter flow cytometer with the FL1 detector in a log mode using the CXP analysis software (both from Beckmann Coulter). For each sample, at least  $10^5$  events were collected. Viable cells are Annexin-V<sup>neg</sup> while apoptotic cells are Annexin-V<sup>pos</sup>.

### Caspase 3–7 activity assay

Apoptotic effects of 24  $\mu$ M GW6471 treatments were measured using the Caspase-Glo 3/7 assay (Promega, Madison, WI, USA), according to manufacturer's instruction. Briefly, cells were seeded in triplicate in 96-well plates ( $5 \times 10^3$  cells/well). After an overnight incubation, cells were incubated with the drug for 24 and 72 hours. At the time of apoptosis measurement, plates were allowed to reach room temperature for 30 minutes, then cells were incubated with the Caspase-Glo 3/7 assay reagent (100  $\mu$ l for 100  $\mu$ l of medium per well). Plates were covered, placed on a shaker for approximately 30 seconds and incubated at room temperature for 30 minutes. Luminescence at 100 nm was analyzed using the VERITAS microplate luminometer (Turner BioSystems) and caspase activity was measured by averaging six determinations.

### Western blotting analysis

Immunoblotting was performed as previously described [23]. Briefly, after treatments the cells were washed with PBS and cell lysates were cleared by centrifugation at 12,000g for 20 minutes. Protein concentrations were determined by the BCA Protein Assay (Thermo Scientific, Rockford, IL, USA), then protein lysates were subjected to electrophoresis followed by immunoblotting. For CDK4, cyclin B1, Cyclin D3 and p21 immunoblotting 30  $\mu$ g of protein lysates were used, whereas for PI3K, GSK3 $\beta$ , pser9GSK3 $\beta$  and  $\beta$ -catenin immunoblotting 50  $\mu$ g/lane of protein lysates were used. The membranes were blocked in 5% nonfat dry milk for one hour at room temperature and incubated overnight at 4°C with the appropriate primary antibodies. Then the membranes were incubated with either anti-rabbit or anti-mouse (1:1000) HRP-conjugated secondary antibodies. The blots were revealed by chemiluminescence using the SuperSignal West Pico Chemiluminescence Substrate (Thermo Scientific, Rockford, IL, USA) according to the manufacturer's instructions.  $\beta$ -actin or GAPDH were used as loading controls.

### Clonogenic assay

Clonogenic assay was performed essentially as described by Franken et al. [25]. Based on preliminary experiments with four different seeding concentrations (100, 200, 300 and 400 cells per well), we chose a concentration of 200 cells per well in a 6-well plate. Following cell attachment we treated cells for 3 days with 24  $\mu$ M GW6471 and then, after medium refreshment, we left the plate in the incubator at 37°C, 5% CO<sub>2</sub>, until cells in the control vehicle formed colonies consisting of at least 50 cells (12–15 days). Colonies were fixed with 6% glutaraldehyde and stained with 0.5% crystal violet, then rinsed with tap water, dried and counted.

### *In vitro* wound-healing assay

Tumor cells in medium containing 10% FBS were seeded in 12-well plates ( $2 \times 10^5$  cells/well). After the cells grew to confluence, wounds were made by sterile pipette tips. Plates were washed twice with PBS in order to remove the detached cells and incubated with medium containing 24  $\mu$ M GW6471 or with vehicle. Pictures of the cultures were taken at 0 h (immediately after scratching) and at the indicated time intervals, until the wound closure was completed by cells treated with vehicle. The number of cells that migrated from the wound edge into the uncovered area was quantified in three fields per well. Data were expressed as ratio of migrated cells after GW6471 treatment versus vehicle.

### Statistical analysis

Comparisons of mean values were performed by the independent samples t-test using the Dunnett's test for multiple comparisons where appropriate. A *p*-value of 0.05 was considered statistically significant. IC<sub>50</sub> values were calculated using the CompuSyn software [26].

## Results

### PPAR $\alpha$ is highly expressed in HNPGL tissues and cells

To evaluate whether PPAR $\alpha$  is a relevant target in HNPGL we analyzed by immunohistochemistry whether this receptor is expressed in HNPGL patient tissues. As shown in Fig 1 PPAR $\alpha$  appears to be expressed in HNPGLs as indicated by the positive staining for this receptor in formalin-fixed, paraffin-embedded tumor sections from two different HNPGL patients. We also evaluated by immunofluorescence the PPARs expression in HNPGL cells. Both PTJ64i and PTJ86i HNPGL cell lines showed an intense nuclear staining for PPAR $\alpha$ , indicating that this protein is highly expressed in HNPGL cells (Fig 2). The fluorescence intensity for PPAR $\alpha$  was higher as compared to that for PPAR $\beta/\delta$  and  $\gamma$  isoforms.

### Effects of PPAR $\alpha$ agonist or antagonist on viability of HNPGL cells

Based on the observation that PPAR $\alpha$  was highly expressed in HNPGL cells we tested whether treatments with a specific PPAR $\alpha$  agonist or antagonist would affect cell viability. Incubation

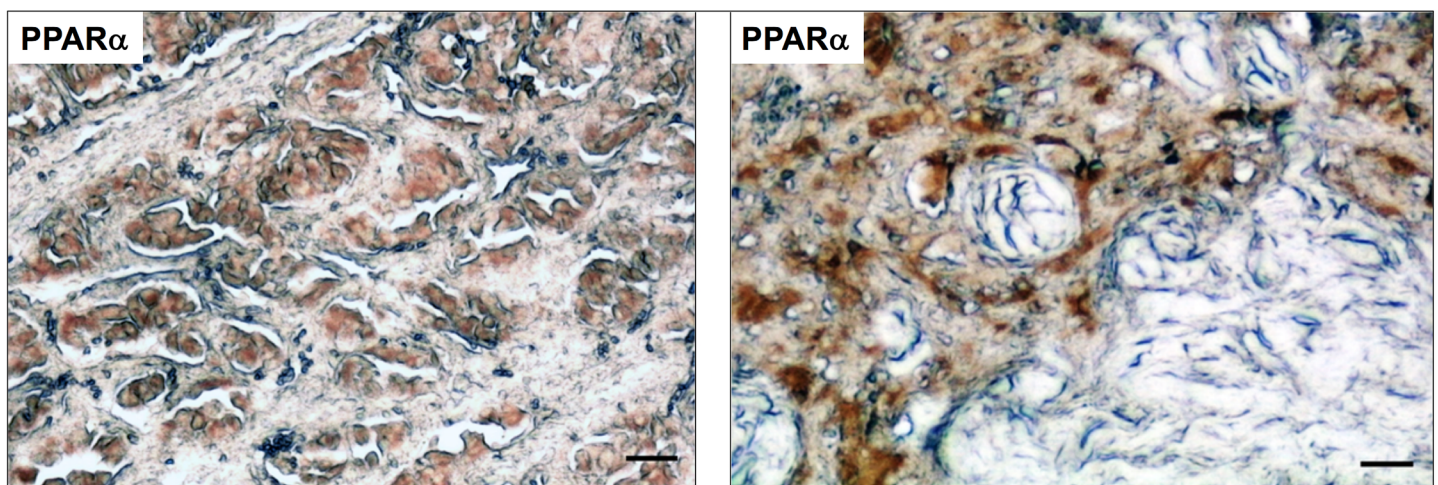

**Fig 1. Immunohistochemical analysis of PPAR $\alpha$  in HNPGL tissues.** Tumor sections derived from two different HNPGL patients show positive immunostaining for PPAR $\alpha$  in paraganglioma cell clusters, while the supporting stroma is negative. Bar = 80  $\mu$ m.

<https://doi.org/10.1371/journal.pone.0178995.g001>

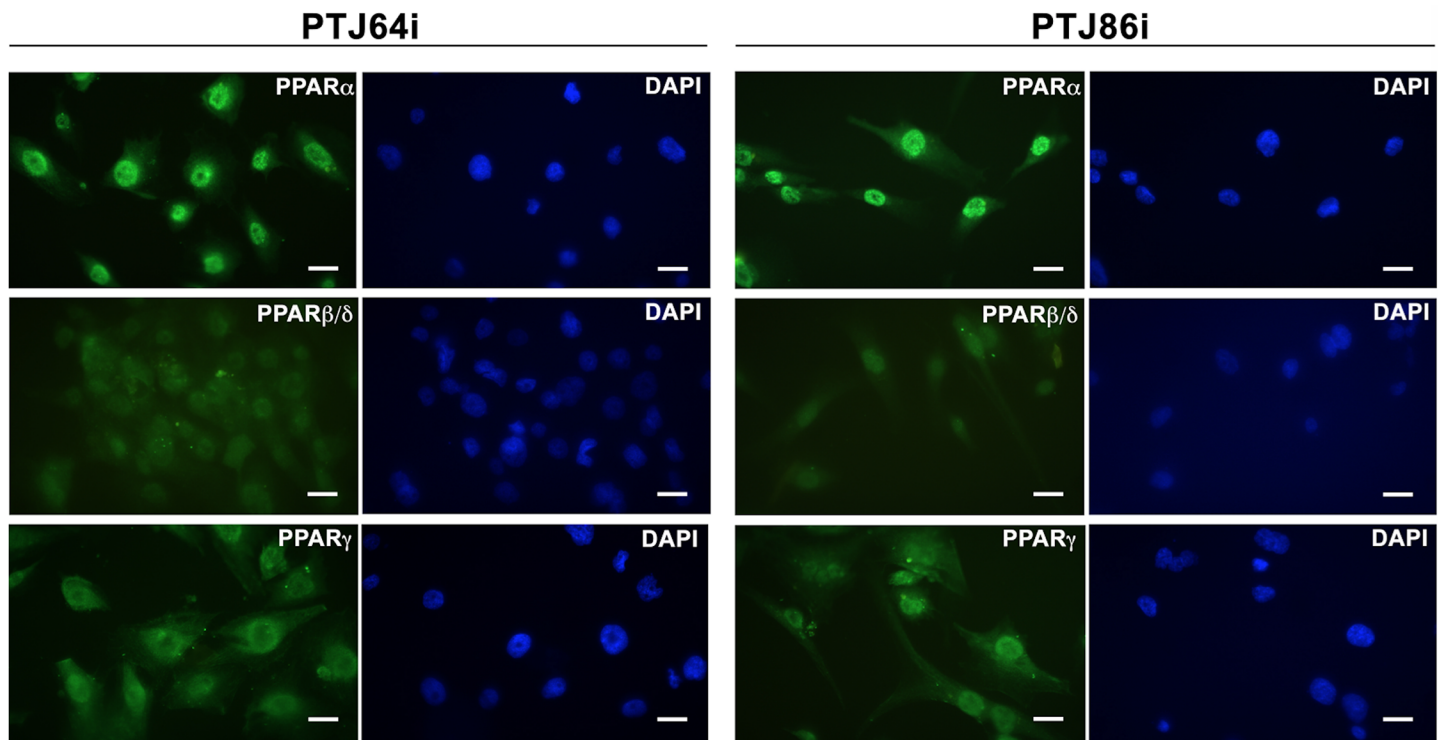

**Fig 2. Immunofluorescence analysis of PPARs in HNPGL cells.** PTJ64i (left panels) and PTJ86i (right panels) show high levels of PPAR $\alpha$  nuclear expression. The fluorescence intensity for PPAR $\alpha$  is stronger as compared to that for PPAR $\beta/\delta$  or PPAR $\gamma$ . Bar = 20  $\mu$ m.

<https://doi.org/10.1371/journal.pone.0178995.g002>

of both PTJ64i and PTJ86i cell lines for 72 hours with the specific PPAR $\alpha$  agonist WY14643, at concentrations ranging from 12.5 to 100  $\mu$ M, did not affect cell viability as assessed by MTT assay (Fig 3 and S1 Table). Conversely, incubation with the specific PPAR $\alpha$  antagonist GW6471 for 72 hours, at concentrations ranging from 3 to 24  $\mu$ M, significantly reduced cell viability in a dose-dependent fashion in both PTJ64i and in PTJ86i cell lines (Fig 3 and S1 Table).

Considering the effect of the antagonist on cell viability, we tested the impact of 24  $\mu$ M GW6471 on PTJ64i and PTJ86i cell growth. Growth rate in the absence of treatment with GW6471 appeared to be faster for PTJ64i as compared to PTJ86i as reflected by cell counts at 24, 48 and 72 hours (Fig 4 and S2 Table). Despite these differences in the intrinsic growth rates, treatment with GW6471 markedly and significantly inhibited cell growth in both cell cultures at 24, 48 and 72 hours in a similar fashion, as compared to vehicle (Fig 4 and S2 Table).

### GW6471 affects cell cycle in HNPGL cells

To investigate whether the decreased cell viability observed after GW6471 treatment could be due to decreased proliferation we evaluated by flow cytometry whether the PPAR $\alpha$  antagonist altered the proportions of cells in different cell cycle phases. The analysis was conducted after incubation of both cell lines with vehicle or 24  $\mu$ M GW6471 for 24 hours. After a 24-hour treatment with GW6471, the percentage of PTJ64i cells in S phase was significantly reduced as compared to untreated cells (9% vs. 17.27% respectively;  $p < 0.01$ ) and the percentage of cells in the G2/M phase tended to increase (from 39.56% to 52.41%) (Fig 5 and S3 Table). This observation shows that the decreased cell viability observed by MTT in PTJ64i cells after treatment

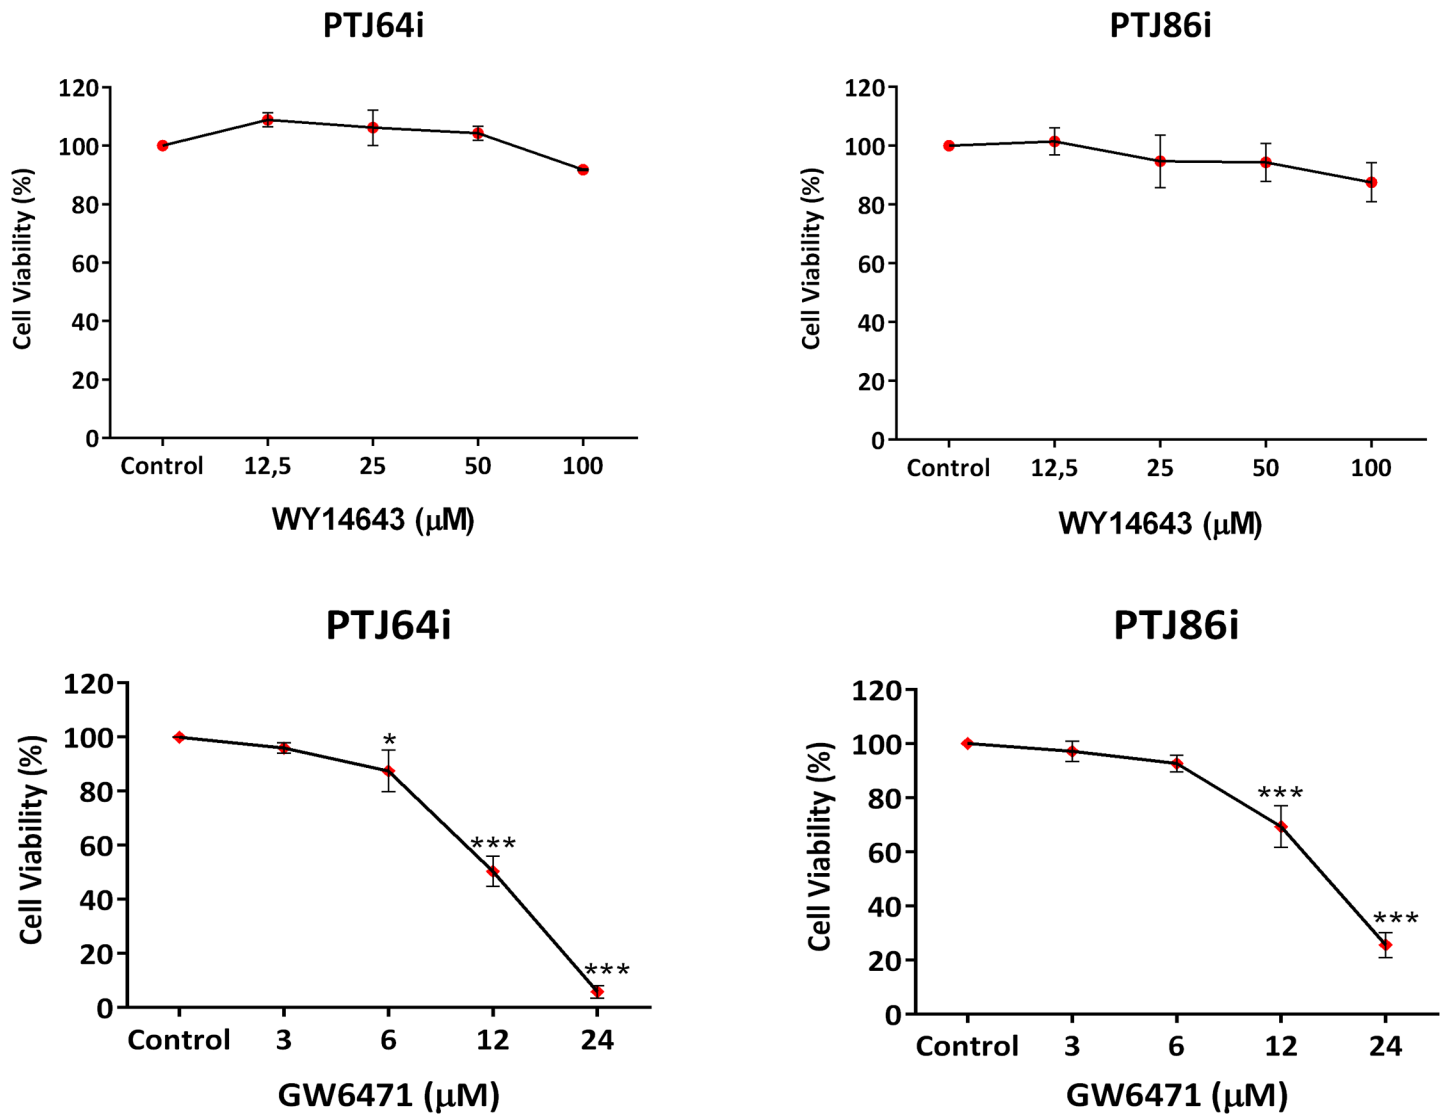

**Fig 3. Effect of the PPAR $\alpha$  agonist WY14643, or antagonist GW6471 on cell viability in PTJ64i and PTJ86i cell lines.** Cells were incubated for 72 hours with WY14643 or GW6471 at the indicated concentrations, or with 0.16% DMSO vehicle (*control*). GW6471 significantly inhibited viability in both cell lines (IC<sub>50</sub> of 10  $\mu$ M in PTJ64i and 16  $\mu$ M in PTJ86i). Data shown are the means  $\pm$ SD of three experiments with quintuplicate determinations. \*Significant differences between control and each drug concentration (\* $p$ <0.05; \*\* $p$ <0.01; \*\*\* $p$ <0.001).

<https://doi.org/10.1371/journal.pone.0178995.g003>

with GW6471 is associated with cell cycle inhibition. After a 24-hour treatment with GW6471, the percentage of PTJ86i cells in G0/G1 phase was significantly increased as compared to untreated cells (67.9% vs. 57.96% respectively;  $p$ <0.01). Conversely, after treatment a decrease in the percentage of cells in S phase (from 17.59% in untreated to 13.38% in treated;  $p$ <0.001) and in G2/M phase (from 24.45% to 18.71%;  $p$ <0.01) was observed (Fig 5 and S3 Table). Therefore, also in PTJ86i the decreased viability observed by MTT after GW6471 treatment is related to cell cycle inhibition, although the effects shown in this cell line appeared distinct from those observed in PTJ64i.

To analyze the mechanism of cell cycle arrest induction by GW6471, we measured the levels of CDK4, cyclin D3, cyclin B1 and p21 cell cycle regulators. Both cell lines were treated for 24 hours with 24  $\mu$ M GW6471 and then the cell lysates were immunoblotted with the appropriate



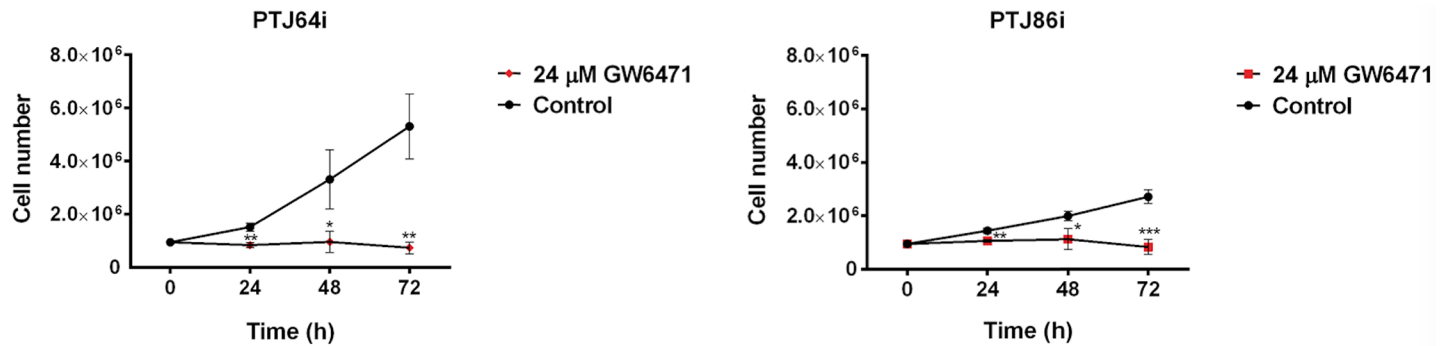

**Fig 4. Growth curves of PTJ64i and PTJ86i cells treated with GW6471.** Cell number was measured over a 72-hour time course treatment with 24 μM GW6471 or with vehicle control. Data shown are the means ±SD of three to five determinations (\**p*<0.05; \*\**p*<0.01; \*\*\**p*<0.001).

<https://doi.org/10.1371/journal.pone.0178995.g004>

antibodies. In agreement with the cell cycle perturbation observed by flow cytometry, after GW6471 treatment CDK4, cyclin D3 and cyclin B1 expression was markedly decreased, whereas the expression of the universal cell cycle inhibitor p21 was increased in both cell lines (Fig 6).

### GW6471 promotes apoptosis in HNPGL cells

To analyze whether, in addition to cell cycle inhibition, the decreased cell viability observed after GW6471 treatment was due in part to apoptosis we evaluated Annexin-V staining by flow cytometry after treatment for 24, 48 and 72 hours. GW6471 treatment resulted in a significant induction of apoptosis in PTJ64i, with a sharper increment of apoptotic cells at 72 hours as compared to 24 and 48 hours (Fig 7 and S4 Table). A significant, but less pronounced, increment of apoptotic cells was observed also with PTJ86i after a 72h treatment with GW6471. Caspase 3/7 analysis confirmed the results obtained by flow cytometry, showing a significant increase of caspase 3/7 activity levels as compared to vehicle control (Fig 8 and S5 Table). These results indicate that programmed cell death contributes to the reduced viability induced by GW6471 in HNPGL cells.

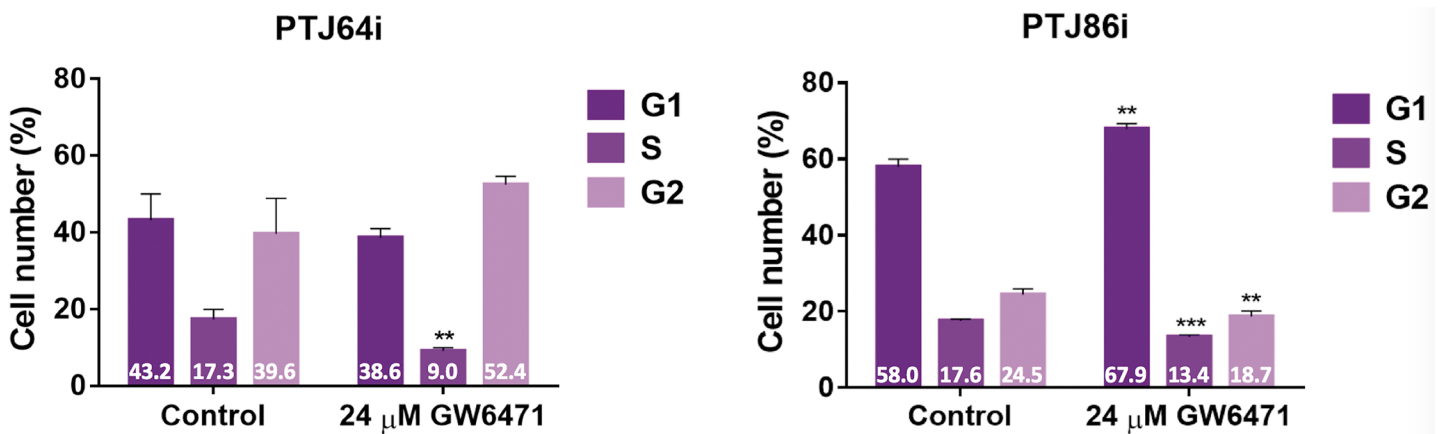

**Fig 5. Effect of GW6471 on PTJ64i and PTJ86i cell cycles.** The histograms show the mean percentage of cells (values inside the bars) in the different cell phases after a 24-hour treatment with 24 μM GW6471 as compared to control (\*\**p*<0.01; \*\*\**p*<0.001).

<https://doi.org/10.1371/journal.pone.0178995.g005>

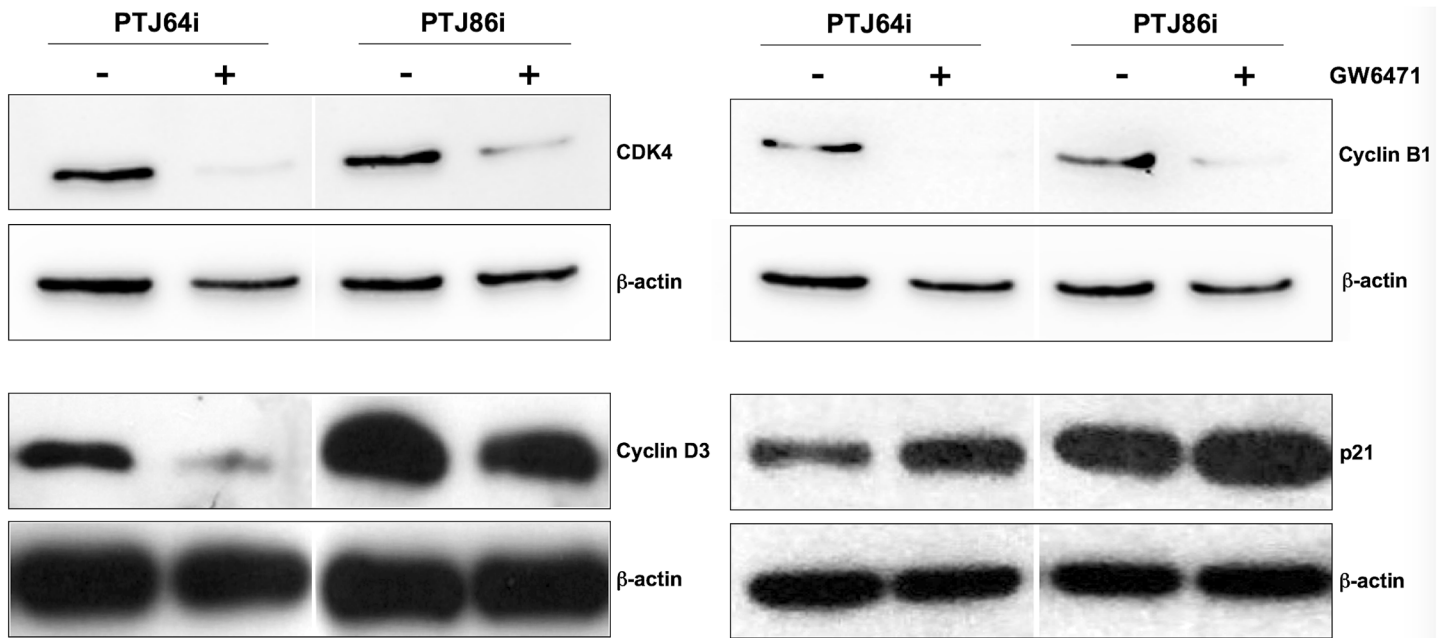

**Fig 6. Effect of GW6471 on the expression of relevant cell cycle proteins in PTJ64i and PTJ86i cell lines.** Expression of relevant cell cycle proteins after incubation of cells for 24 hours with 24  $\mu$ M GW6471 was analyzed by Western blot using antibodies directed against the indicated proteins.

<https://doi.org/10.1371/journal.pone.0178995.g006>

### GW6471 represses the PI3K/GSK3/ $\beta$ -catenin pathway in HNPGL cell lines

Western Blot analysis revealed that GW6471 treatment decreased phosphoinositide 3-kinase (PI3K) protein expression in both HNPGL cell lines. In addition, GW6471 treatment was

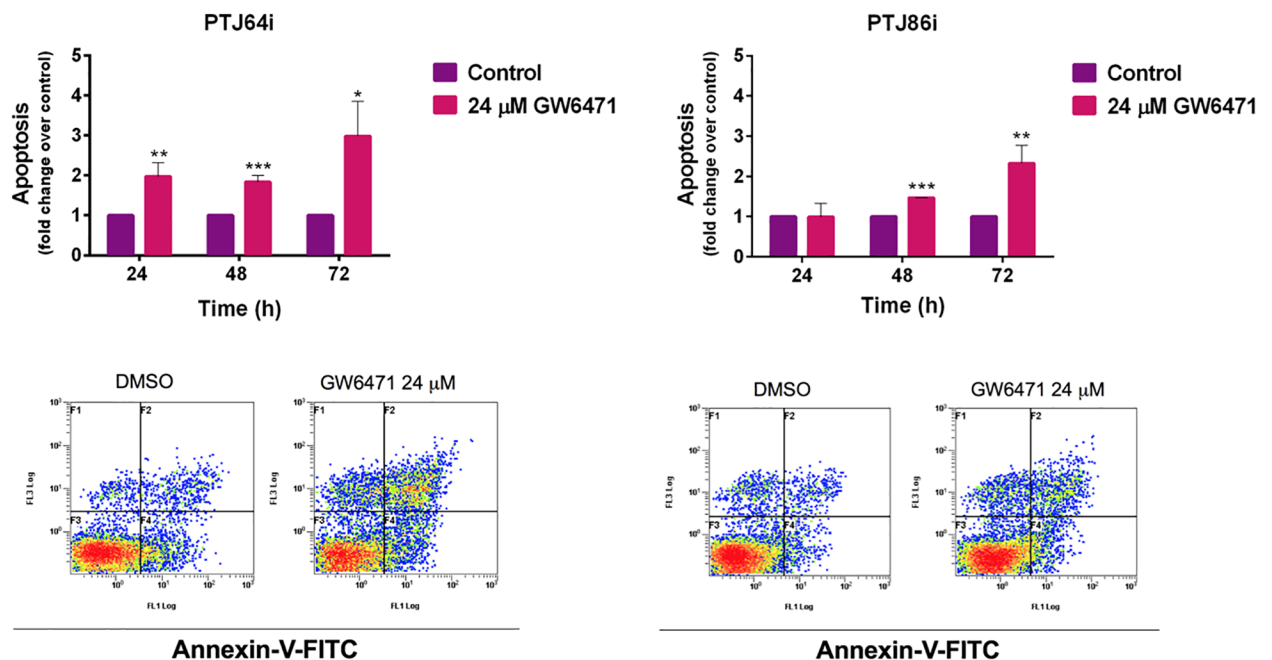

**Fig 7. Apoptosis in PTJ64i and PTJ86i cells treated with 24  $\mu$ M GW6471 for 24, 48 or 72 hours.** Values represented in the histograms (top) are the means  $\pm$ SD of at least two independent determinations (\* $p$ <0.05; \*\* $p$ <0.01; \*\*\* $p$ <0.001). Dot plots (bottom) show representative experiments after a 72-hour treatment with 24  $\mu$ M GW6471.

<https://doi.org/10.1371/journal.pone.0178995.g007>

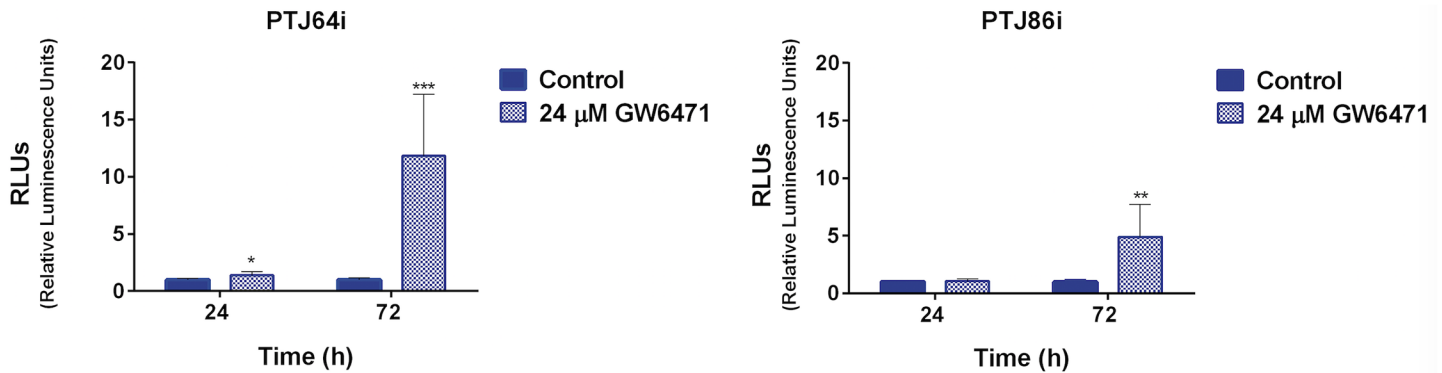

**Fig 8. Caspase 3/7 activity in PTJ64i and PTJ86i cells treated with 24 μM GW6471 for 24 and 72 hours.** Values represented in the histograms are the means ±SD of six determinations (\* $p < 0.05$ ; \*\* $p < 0.01$ ; \*\*\* $p < 0.001$ ).

<https://doi.org/10.1371/journal.pone.0178995.g008>

associated with a trend of increased glycogen synthase kinase 3β (GSK3β) protein expression, as well decreased phosphorylation of GSK3β at Ser9 (the inactivated form of GSK3β) (Fig 9 and S6 Table). Consistently, GW6471 decreased the expression of β-catenin in both PTJ64i and PTJ86i cells (Fig 9 and S6 Table). Collectively, these results indicate that PI3K/GSK3β/β-catenin signal was repressed by GW6471 in HNPGL.

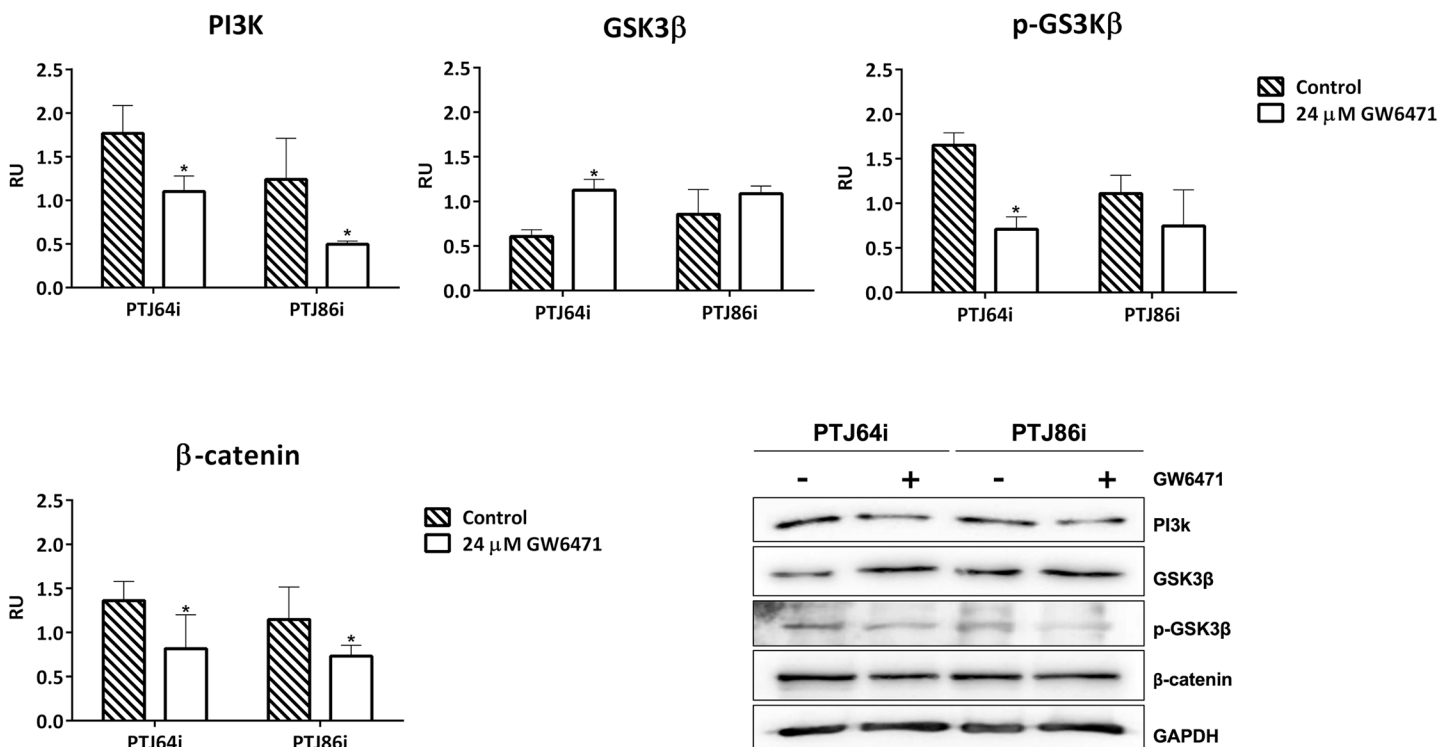

**Fig 9. Effect of GW6471 on PI3K/GSK-3β/β-catenin signaling pathway in PTJ64i and PTJ86i cell lines.** Histograms of normalized densitometric analyses and representative western blotting for PI3K, GSK3β, p-GSK3β and β-catenin in HNPGL cells treated with 24 μM GW6471 for 72 hours are shown. The relative densities of the immunoreactive bands were determined and normalized with respect to GAPDH (loading control) using a semiquantitative densitometric analysis (Kodak ID Image Analysis Software, Rochester, NY, USA). Values are expressed as relative units (RU). Each bar represents the mean ± SD of two up to five independent determinations (\* $p < 0.05$ ).

<https://doi.org/10.1371/journal.pone.0178995.g009>

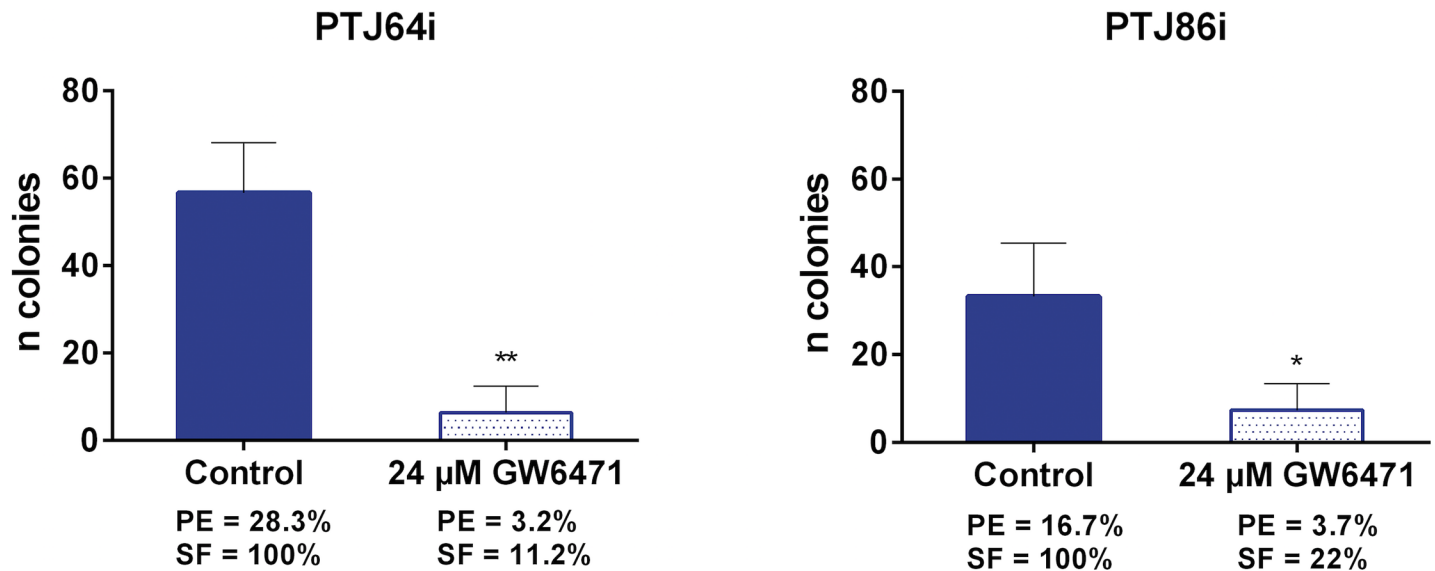

**Fig 10. Effect of GW6471 on clonogenic activity of PTJ64i and PTJ86i cell lines.** Data shown in the histograms are the means  $\pm$ SD of three independent experiments (\* $p < 0.05$ ; \*\* $p < 0.01$ ). PE: plating efficiency [(# of colonies formed/# of cells plated)\*100]; SF: surviving fraction [(# of colonies formed \*100)/(# of cells plated \*PE of control vehicle)].

<https://doi.org/10.1371/journal.pone.0178995.g010>

### GW6471 inhibits clonogenicity and migration of HNPGL cells

In the absence of treatment PTJ64i showed a higher plating efficiency than PTJ86i. Treatment with 24  $\mu$ M GW6471 drastically impaired clonogenic activity of both cell cultures, as indicated by the reduced plating efficiency and surviving fraction as compared to vehicle control (Fig 10 and S7 Table). Overall, wound healing assay showed that 24  $\mu$ M GW6471 had a modest effect on the migration of HNPGL cell lines at 8 hours (Fig 11 and S8 Table). This effect appeared more pronounced at 16 hours in PTJ64i.

### Discussion

HNPGLs are rare neoplasms of the paraganglia that cause important morbidity. At present, surgery is the only effective therapeutic option. Thus, novel therapeutic targets and molecules that could be exploited in HNPGL treatment are highly needed.

Targeting aberrant cell growth and metabolic pathways for cancer treatment is currently of great interest. In this regard, PPARs are ligand-activated transcription factors that are often deregulated in tumors [8]. In particular, the PPAR $\alpha$  isoform appears to play an important role in the biology of different tumors where it may act as a tumor suppressor or an oncoprotein depending on cancer type. Tumor suppression by PPAR $\alpha$  agonists has been reported in some cancers [27, 28], while PPAR $\alpha$  overexpression has been found to lead to progression in other cancers [9–12, 14, 29]. Considering that PPAR $\alpha$  is a candidate therapeutic target in some tumors and that its role in HNPGLs was never studied before we analyzed the expression of this nuclear receptor in HNPGL and tested the effects of a specific PPAR $\alpha$  agonist (WY14643) or antagonist (GW6471).

We observed an intense immunoreactivity for PPAR $\alpha$  in HNPGL tumors, suggesting that this receptor has an important role also in HNPGL. A pronounced nuclear expression of PPAR $\alpha$  was confirmed in both PTJ64i and PTJ86i HNPGL cell lines. Notably, the fluorescence intensity for PPAR $\alpha$  in HNPGL cell lines was comparable to what we have previously observed in glioblastoma [12], a tumor overexpressing PPAR $\alpha$  whose viability is also affected by a

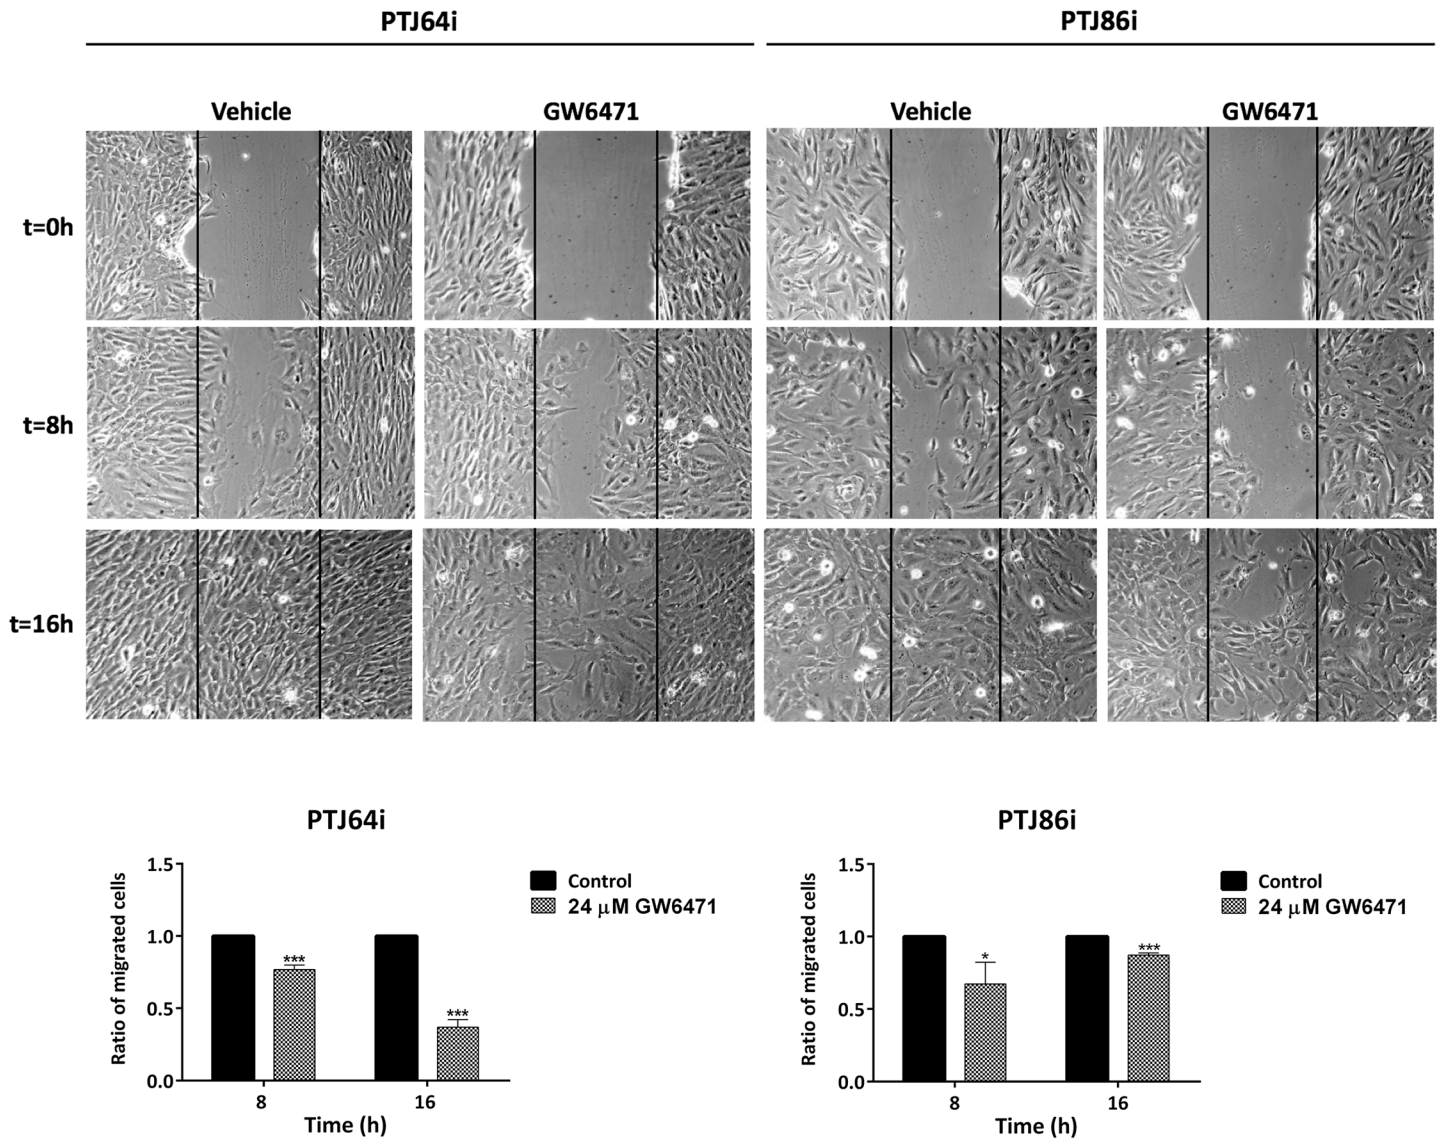

**Fig 11. Wound healing assay.** The effect of 24  $\mu$ M GW6471 on HNPGL cell migration was evaluated by a monolayer wound-healing assay. Pictures of PTJ64i and PTJ86i cells treated with vehicle or with GW6471 were taken at 0, 8 and 16 hours to analyze the dynamics of wound closure (vertical lines indicate wound edges). Histograms represent quantitative analyses of cell migration and are expressed as the ratio of the number of migrated cells in three fields after treatment as compared with vehicle (\* $p$ <0.05; \*\*\* $p$ <0.001).

<https://doi.org/10.1371/journal.pone.0178995.g011>

PPAR $\alpha$  antagonist [20]. The overexpression of PPAR $\alpha$  and its nuclear localization suggested that antagonizing this protein might have antitumor effects in HNPGL. In line with this possibility the agonist WY14643 did not affect cell viability, whereas GW6471 reduced viability in both PTJ64i and PTJ86i in a dose-dependent way. GW6471 also reduced growth of both HNPGL cell cultures. These findings obtained with GW6471 in HNPGL cells are in line with those previously reported for kidney cancer cells, where the same molecule reduced cell viability by specific inhibition of PPAR $\alpha$  [14]. In that study, the effects of GW6471 on the growth and viability of kidney cancer cells were related to interference with cell cycle and induction of apoptosis. Also in our study, the reduced viability observed in both HNPGL cell lines after GW6471 treatment was related to an interference with cell cycle progression and apoptosis. In

this regard, GW6471 altered the expression of cell cycle proteins in a similar fashion in both HNPGL cell lines and affected cell cycle progression. Nevertheless, the pattern of cell cycle inhibition observed in PTJ64i by flow cytometry appeared to be distinct from that observed in PTJ86i. This might reflect the intrinsic growth rate of the two cell lines, which appeared to be lower in PTJ86i. Regarding the effects of GW6471 on apoptosis this drug induced caspase-dependent apoptosis in both PTJ64i and PTJ86i cell lines, with a significant and more evident effect on apoptosis after a 72-hour treatment. Also the clonogenic ability of HNPGL cells, which constitutes a direct measure of cell self-renewal capacity [25], was markedly reduced after GW6471 treatment, indicating that the drug had a profound impact on this capacity. Conversely, the effect of GW6471 on HNPGL cell migration was less marked.

The  $\beta$ -catenin transcriptional program pathway plays a crucial role in several processes relevant to tumor biology [30]. The level of intracellular  $\beta$ -catenin is regulated by PI3K via GSK3 $\beta$ , which phosphorylates  $\beta$ -catenin to promote its ubiquitin-proteasome degradation [31]. Our data show that GW6471 treatment was associated with decreased expression of PI3K. We also observed the reduction of  $\beta$ -catenin protein expression in HNPGL cells, which was consistent with the alterations of GSK3 $\beta$  expression and phosphorylation observed in response to GW6471. Taken together, our data show that the inhibitory effect of GW6471 on HNPGL cell viability was due, at least in part, to the inhibition of the PI3K/GSK3 $\beta$ / $\beta$ -catenin signaling pathway.

Overall, our results indicate a remarkable antitumor effect of GW6471 on HNPGL *in vitro*. Future studies will be necessary to test whether this molecule is active also in animal models of HNPGL. In this regard, it is worth noting that PPAR $\alpha$  inhibition by GW6471 was recently reported to attenuate kidney cancer growth in a xenograft mouse model, with no adverse effects in the animals [32].

In conclusion, we show that PPAR $\alpha$  is overexpressed in HNPGL and that the PPAR $\alpha$  antagonist GW6471 is able to reduce viability in this unique model of HNPGL cells by interfering with cell cycle and by inducing apoptosis. The mechanisms affecting HNPGL cell viability involve repression of the PI3K/GSK3 $\beta$ / $\beta$ -catenin pathway. Therefore, PPAR $\alpha$  could represent a novel therapeutic target for this rare chemoresistant tumor. To our knowledge this is the first study analyzing the effects of molecules with therapeutic potential in an *in vitro* model of HNPGL cells.

## Supporting information

**S1 Table.** Effect of WY14643 (A) or GW6471 (B) treatments on cell viability (%) as assessed by MTT.  
(XLSX)

**S2 Table.** Effect of GW6471 treatment on cell growth.  
(XLSX)

**S3 Table.** Effect of GW6471 treatment on cell cycle as assessed by flow cytometry.  
(XLSX)

**S4 Table.** Effect of GW6471 treatment on apoptosis as assessed by flow cytometry.  
(XLSX)

**S5 Table.** Effect of GW6471 treatment on caspase 3/7 activity.  
(XLSX)

**S6 Table.** Effect of GW6471 treatment on PI3K/GSK3 $\beta$ / $\beta$ -catenin pathway.  
(XLSX)

**S7 Table. Effect of GW6471 treatment on colony formation.**  
(XLSX)

**S8 Table. Effect of GW6471 treatment on wound healing.**  
(XLSX)

## Acknowledgments

We acknowledge the Fondazione Mario Sanna (Mario Sanna Foundation, <http://www.gruppootologico.com/it/istituzionale/fondazione-mario-sanna>), Dr. Carlo T. Paties, Dr. Anna Nassani and Dr. Silvia Perconti for technical and organizational support.

## Author Contributions

**Conceptualization:** LDL A. Cama.

**Formal analysis:** RF LDL VdG A. Cama.

**Funding acquisition:** RMC A. Cama.

**Investigation:** RF LDL VdG MCDM LC MB DV.

**Methodology:** RF FV.

**Project administration:** RMC A. Cama.

**Resources:** SCP A. Cimini A. Cataldi MS A. Cama.

**Supervision:** AA A. Cimini A. Cataldi GM A. Cama.

**Visualization:** RF LDL VdG LC.

**Writing – original draft:** LDL A. Cama.

**Writing – review & editing:** AA A. Cimini RMC GM.

## References

1. Taïeb D, Kaliski A, Boedeker CC, Martucci V, Fojo T, Adler JR Jr, et al. Current approaches and recent developments in the management of head and neck paragangliomas. *Endocr Rev.* 2014 Oct; 35: 795–819. <https://doi.org/10.1210/er.2014-1026> PMID: 25033281
2. Baysal BE, Ferrell RE, Willett-Brozick JE, Lawrence EC, Myssiorek D, Bosch A, et al. Mutations in SDHD, a mitochondrial complex II gene, in hereditary paraganglioma. *Science.* 2000 Feb 4; 287: 848–851. PMID: 10657297
3. Rustin P, Munnich A, Rötig A. Succinate dehydrogenase and human diseases: new insights into a well-known enzyme. *Eur J Hum Genet.* 2002 May; 10: 289–291. <https://doi.org/10.1038/sj.ejhg.5200793> PMID: 12082502
4. Lack EE, Lloyd RV, Carney JA, Woodruff JM; Association of Directors of Anatomic and Surgical Pathology. Recommendations for reporting of extra-adrenal paragangliomas. *Mod Pathol.* 2003 Aug; 16: 833–855. <https://doi.org/10.1097/01.MP.0000081050.89276.CA> PMID: 12920230
5. Fliedner SM, Lehnert H, Pacak K. Metastatic paraganglioma. *Semin Oncol.* 2010 Dec; 37: 627–637. <https://doi.org/10.1053/j.seminoncol.2010.10.017> PMID: 21167381
6. Cama A, Verginelli F, Lotti LV, Napolitano F, Morgano A, D'Orazio A, et al. Integrative genetic, epigenetic and pathological analysis of paraganglioma reveals complex dysregulation of NOTCH signaling. *Acta Neuropathol.* 2013 Oct; 126: 575–594. <https://doi.org/10.1007/s00401-013-1165-y> PMID: 23955600

7. Kersten S, Mandard S, Escher P, Gonzalez FJ, Tafuri S, Desvergne B, et al. The peroxisome proliferator-activated receptor alpha regulates amino acid metabolism. *FASEB J*. 2001 Sep; 15: 1971–8. <https://doi.org/10.1096/fj.01-0147com> PMID: 11532977
8. Peters JM, Shah YM, Gonzalez FJ. The role of peroxisome proliferator-activated receptors in carcinogenesis and chemoprevention. *Nat Rev Cancer*. 2012 Feb 9; 12: 181–195. <https://doi.org/10.1038/nrc3214> PMID: 22318237
9. Peters JM, Cheung C, Gonzalez FJ. Peroxisome proliferator-activated receptor-alpha and liver cancer: where do we stand? *J Mol Med (Berl)*. 2005 Oct; 83: 774–785.
10. Suchanek KM, May FJ, Robinson JA, Lee WJ, Holman NA, Monteith GR, et al. Peroxisome proliferator-activated receptor alpha in the human breast cancer cell lines MCF-7 and MDA-MB-231. *Mol Carcinog*. 2002 Aug; 34: 165–171. <https://doi.org/10.1002/mc.10061> PMID: 12203367
11. Benedetti E, Galzio R, D'Angelo B, Cerù MP, Cimini A. PPARs in Human Neuroepithelial Tumors: PPAR Ligands as Anticancer Therapies for the Most Common Human Neuroepithelial Tumors. *PPAR Res*. 2010; 2010:427401. <https://doi.org/10.1155/2010/427401> PMID: 20339586
12. Laurenti G, Benedetti E, D'Angelo B, Cristiano L, Cinque B, Raysi S, et al. Hypoxia induces peroxisome proliferator-activated receptor  $\alpha$  (PPAR $\alpha$ ) and lipid metabolism peroxisomal enzymes in human glioblastoma cells. *J Cell Biochem*. 2011 Dec; 112: 3891–3901. <https://doi.org/10.1002/jcb.23323> PMID: 21866563
13. Tung S, Shi Y, Wong K, Zhu F, Gorczynski R, Laister RC, et al. PPAR $\alpha$  and fatty acid oxidation mediate glucocorticoid resistance in chronic lymphocytic leukemia. *Blood*. 2013 Aug 8; 122: 969–980. <https://doi.org/10.1182/blood-2013-03-489468> PMID: 23814018
14. Aboud OA, Wettersten HI, Weiss RH. Inhibition of PPAR $\alpha$  induces cell cycle arrest and apoptosis, and synergizes with glycolysis inhibition in kidney cancer cells. *PLoS One*. 2013 Aug 7; 8: e71115. <https://doi.org/10.1371/journal.pone.0071115> PMID: 23951092
15. Benedetti E, Galzio R, Laurenti G, D'Angelo B, Melchiorre E, Cifone MG, et al. Lipid metabolism impairment in human gliomas: expression of peroxisomal proteins in human gliomas at different grades of malignancy. *Int J Immunopathol Pharmacol*. 2010 Jan-Mar; 23:235–246. <https://doi.org/10.1177/039463201002300121> PMID: 20378009
16. Peters JM, Cattley RC, Gonzalez FJ. Role of PPAR alpha in the mechanism of action of the nongenotoxic carcinogen and peroxisome proliferator Wy-14,643. *Carcinogenesis*. 1997 Nov; 18: 2029–2033. PMID: 9395198
17. Kaipainen A, Kieran MW, Huang S, Butterfield C, Bielenberg D, Mostoslavsky G, et al. PPARalpha deficiency in inflammatory cells suppresses tumor growth. *PLoS One*. 2007 Feb 28; 2: e260. <https://doi.org/10.1371/journal.pone.0000260> PMID: 17327920
18. Ammazalorso A, De Filippis B, Giampietro L, Amoroso R. Blocking the peroxisome proliferator-activated receptor (PPAR): an overview. *ChemMedChem*. 2013 Oct; 8: 1609–1616. <https://doi.org/10.1002/cmdc.201300250> PMID: 23939910
19. Ammazalorso A, Carrieri A, Verginelli F, Bruno I, Carbonara G, D'Angelo A, et al. Synthesis, in vitro evaluation, and molecular modeling investigation of benzenesulfonamide peroxisome proliferator-activated receptors  $\alpha$  antagonists. *Eur J Med Chem*. 2016 May 23; 114: 191–200. <https://doi.org/10.1016/j.ejmech.2016.02.064> PMID: 26974385
20. Benedetti E, d'Angelo M, Ammazalorso A, Gravina GL, Laezza C, Antonosante A, et al. PPAR $\alpha$  Antagonist AA452 Triggers Metabolic Reprogramming and Increases Sensitivity to Radiation Therapy in Human Glioblastoma Primary Cells. *J Cell Physiol*. 2017 Jun; 232: 1458–1466. <https://doi.org/10.1002/jcp.25648> PMID: 27736000
21. Astuti D, Latif F, Dallol A, Dahia PL, Douglas F, George E, et al. Gene mutations in the succinate dehydrogenase subunit SDHB cause susceptibility to familial pheochromocytoma and to familial paraganglioma. *Am J Hum Genet*. 2001 Jul; 69: 49–54. <https://doi.org/10.1086/321282> PMID: 11404820
22. Piccini V, Rapizzi E, Bacca A, Di Trapani G, Pulli R, Giachè V, et al. Head and neck paragangliomas: genetic spectrum and clinical variability in 79 consecutive patients. *Endocr Relat Cancer*. 2012 Apr 10; 19: 149–155. <https://doi.org/10.1530/ERC-11-0369> PMID: 22241717
23. Mincione G, Tarantelli C, Vianale G, Di Marcantonio MC, Cotellese R, Francomano F, et al. Mutual regulation of TGF- $\beta$ 1, T $\beta$ RII and ErbB receptors expression in human thyroid carcinomas. *Exp Cell Res*. 2014 Sep 10; 327: 24–36. <https://doi.org/10.1016/j.yexcr.2014.06.012> PMID: 24973511
24. Strober W. Trypan blue exclusion test of cell viability. *Curr Protoc Immunol*. 2001 May; Appendix 3: Appendix 3B.
25. Franken NA, Rodermond HM, Stap J, Haveman J, van Bree C. Clonogenic assay of cells in vitro. *Nat Protoc*. 2006; 1: 2315–2319. <https://doi.org/10.1038/nprot.2006.339> PMID: 17406473



26. Chou TC. Drug combination studies and their synergy quantification using the Chou-Talalay method. *Cancer Res.* 2010 Jan 15; 70: 440–446. <https://doi.org/10.1158/0008-5472.CAN-09-1947> PMID: [20068163](https://pubmed.ncbi.nlm.nih.gov/20068163/)
27. Grabacka M, Plonka PM, Urbanska K, Reiss K. Peroxisome proliferator-activated receptor alpha activation decreases metastatic potential of melanoma cells in vitro via down-regulation of Akt. *Clin Cancer Res.* 2006 May 15; 12: 3028–3036. <https://doi.org/10.1158/1078-0432.CCR-05-2556> PMID: [16707598](https://pubmed.ncbi.nlm.nih.gov/16707598/)
28. Panigrahy D, Kaipainen A, Huang S, Butterfield CE, Barnés CM, Fannon M, et al. PPARalpha agonist fenofibrate suppresses tumor growth through direct and indirect angiogenesis inhibition. *Proc Natl Acad Sci U S A.* 2008 Jan 22; 105: 985–990. <https://doi.org/10.1073/pnas.0711281105> PMID: [18199835](https://pubmed.ncbi.nlm.nih.gov/18199835/)
29. Chang NW, Wu CT, Chen DR, Yeh CY, Lin C. High levels of arachidonic acid and peroxisome proliferator-activated receptor-alpha in breast cancer tissues are associated with promoting cancer cell proliferation. *J Nutr Biochem.* 2013 Jan; 24: 274–281. <https://doi.org/10.1016/j.jnutbio.2012.06.005> PMID: [22902323](https://pubmed.ncbi.nlm.nih.gov/22902323/)
30. Zhan T, Rindtorff N, Boutros M. Wnt signaling in cancer. *Oncogene.* 2017 Mar; 36: 1461–1473. <https://doi.org/10.1038/onc.2016.304> PMID: [27617575](https://pubmed.ncbi.nlm.nih.gov/27617575/)
31. Wu D, Pan W. GSK3: a multifaceted kinase in Wnt signaling. *Trends Biochem Sci.* 2010 Mar; 35: 161–168. <https://doi.org/10.1016/j.tibs.2009.10.002> PMID: [19884009](https://pubmed.ncbi.nlm.nih.gov/19884009/)
32. Abu Aboud O, Donohoe D, Bultman S, Fitch M, Riiff T, Hellerstein M, et al. PPAR $\alpha$  inhibition modulates multiple reprogrammed metabolic pathways in kidney cancer and attenuates tumor growth. *Am J Physiol Cell Physiol.* 2015 Jun 1; 308: C890–898. <https://doi.org/10.1152/ajpcell.00322.2014> PMID: [25810260](https://pubmed.ncbi.nlm.nih.gov/25810260/)
